# Supplementary material for: Controllable one step copper coating on carbon nanofibers for flexible cholesterol biosensor substrates
Source: Royal Society of Chemistry journal article supplement (doi:10.1039/c5tb01781e), 2015-11-25
Supplement: c5tb01781e1.pdf [file c5tb01781e1.pdf]

## Supporting Information for:

# Controllable one step copper coating on carbon nanofibers for flexible cholesterol biosensor substrate

*Bharat Bajaj<sup>a,e</sup>, Han I. Joh<sup>a</sup>, Seong M. Jo<sup>a,b</sup>, GurpreetKaur<sup>c</sup>, Anjali Sharma<sup>3</sup>, Monika Tomar<sup>d</sup>,  
Vinay Gupta<sup>c,\*</sup>, and Sungho Lee<sup>a,b\*</sup>*

<sup>a</sup>Carbon Convergence Materials Research Center, Institute of Advanced Composite  
Materials, Korea Institute of Science and Technology, San 101, Eunha-ri, Bongdoug-eup,  
Wanju-gun, Jeollabuk-do 565-905, Korea

<sup>b</sup>Department of Nano Material Engineering, Korea University of Science and Technology,  
217 Gajeong-ro, Yuseong-gu, Daejeon 305-350 Korea

<sup>c</sup>Department of Physics and Astrophysics, University of Delhi, New Delhi-110007, India

<sup>d</sup>Department of Physics, Miranda House, University of Delhi, New Delhi-110007, India

<sup>e</sup>School of Electrical and Electronic Engineering, Yonsei University, 50 Yonsei-ro,  
Seodaemun-gu, Seoul 120-749, Republic of Korea

### Corresponding Author

\*E-mail: [sunghol@kist.re.kr](mailto:sunghol@kist.re.kr) (Sungho Lee), [vgupta@physics.du.ac.in](mailto:vgupta@physics.du.ac.in) (Vinay Gupta)

## Result and discussion

The EDAX data for the CuO coated CNF revealed the presence of copper compound on nanofiber surface as shown in Figures S2 (a-f). The peak intensities of CuO to CNF were increasing when temperature increases from 100 to 140° C. The atomic % of carbon, oxygen, nitrogen and copper element as shown in Table S1 indicates that the CNF surface coverage ratio of CuO nanoparticles was higher with increase in temperature near to the boiling point of solvent. These results were in agreement with XRD and SEM results.

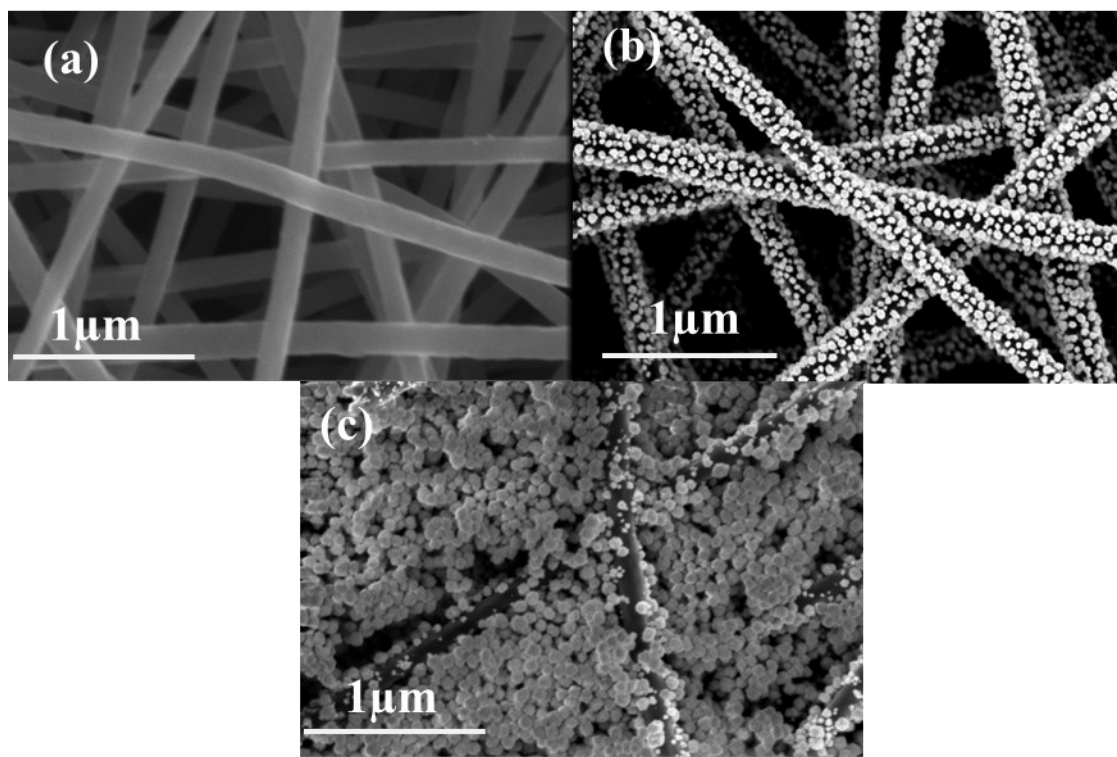

**Figure S1.** SEM images of CuO decorated CNF: (a) 80 (b) 100°C, and (c) 140°C.

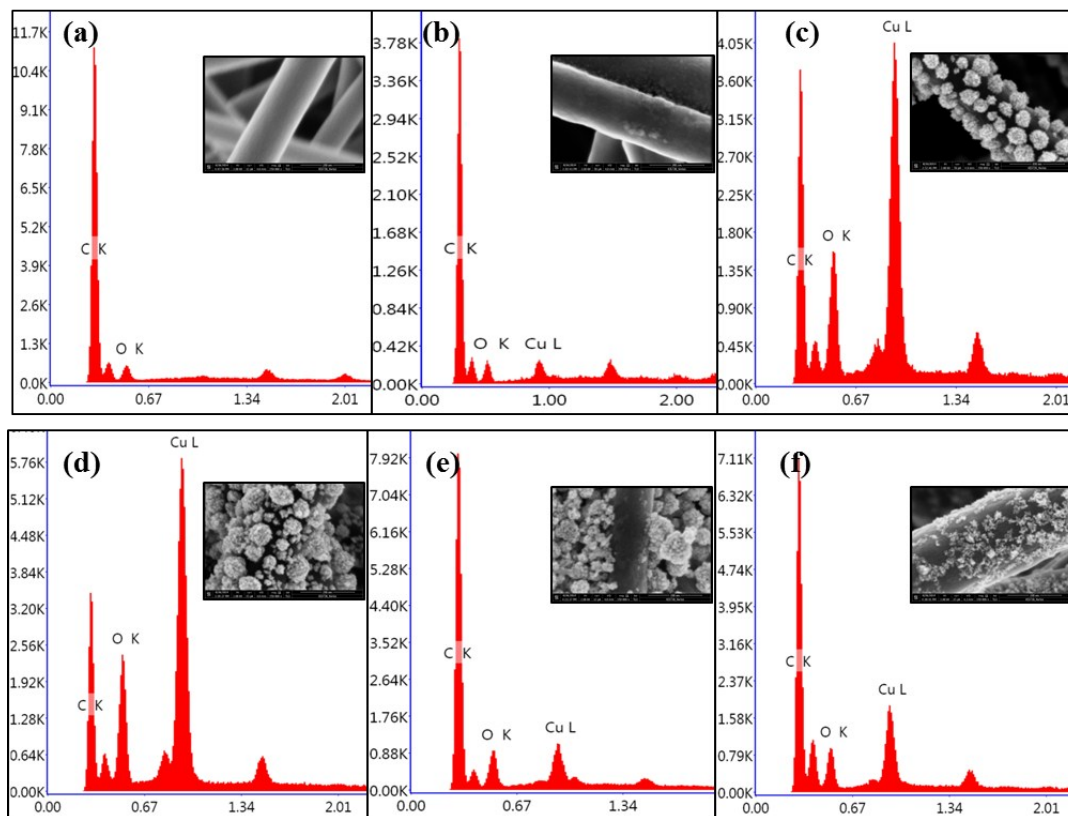

**Figure S2.** EDAX analysis of CuO decorated CNF: (a) CNF, (b) 80°C, (c) 100°C, (d) 120°C, (e) 140°C and (f) 160°C and inset high resolution SEM images of CuO-CNF.

**Table S1.** Elemental analysis and conductivity at different temperature

| Sample     | Carbon<br>Atomic% | Oxygen<br>Atomic % | Nitrogen<br>Atomic% | Copper<br>Atomic% | Conductivity<br>Sm <sup>-1</sup> |
|------------|-------------------|--------------------|---------------------|-------------------|----------------------------------|
| CNF        | 62.71             | 7.76               | 29.53               | NA                | 474                              |
| CNF-CuO 80 | 66.88             | 6.89               | 24.77               | 1.46              | 203                              |
| CNF-CuO100 | 50.07             | 18.93              | 18.63               | 12.37             | 224                              |
| CNF-CuO120 | 43.70             | 22.14              | 18.29               | 15.77             | 251                              |
| CNF-CuO140 | 27.13             | 35.20              | 8.32                | 29.36             | 308                              |
| CNF-CuO160 | 51.73             | 11.16              | 33.20               | 3.91              | 210                              |

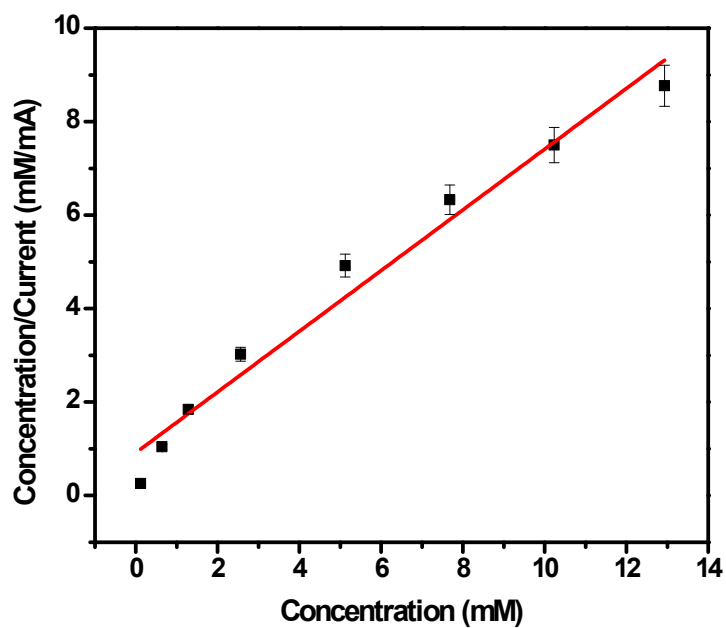

**Figure S3.** Hanes Plot.

**Table S2.** Demonstration of flexible sensor- Variation of sensor response with bending condition

| Bending Condition     | Image                                                                               | Peak oxidation current of ChOx/CuO/CNF bioelectrode upon addition of cholesterol (2.56 mM) |
|-----------------------|-------------------------------------------------------------------------------------|--------------------------------------------------------------------------------------------|
| No bending            | 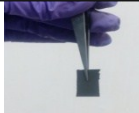 | 0.83 mA                                                                                    |
| Moderate bending      |  | 0.80 mA                                                                                    |
| Complete bending      |  | 0.76 mA                                                                                    |
| Bending reverted back |  | 0.83 mA                                                                                    |

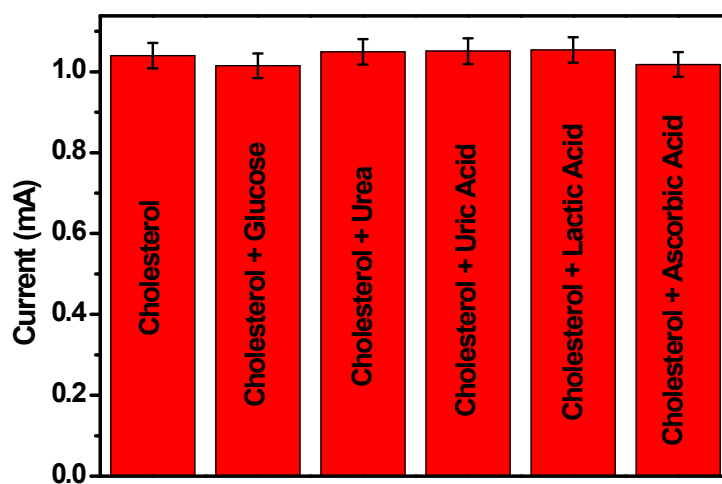

**Figure S4.** Selectivity test.

**Table S3.** Real serum sample analysis

| Sample Number | Free cholesterol Concentration (mM) |                    | R.S.D. of developed biosensor (n=3) | Spike (mM) | Data after Spike          |              |                                    |
|---------------|-------------------------------------|--------------------|-------------------------------------|------------|---------------------------|--------------|------------------------------------|
|               | Biosensor                           | Spectrophotometric |                                     |            | Cholesterol concentration | Recovery (%) | R.S.D. of developed biosensor (n=) |
| 1             | 1.09                                | 1.16               | 2.3 %                               | 2.56       | 3.60                      | 98           | 2.1 %                              |
| 2             | 1.46                                | 1.39               | 1.9 %                               | 2.56       | 4.06                      | 101          | 1.8 %                              |
